# Supplementary material
Source: PubMed Central journal article supplement (PMC1794260)

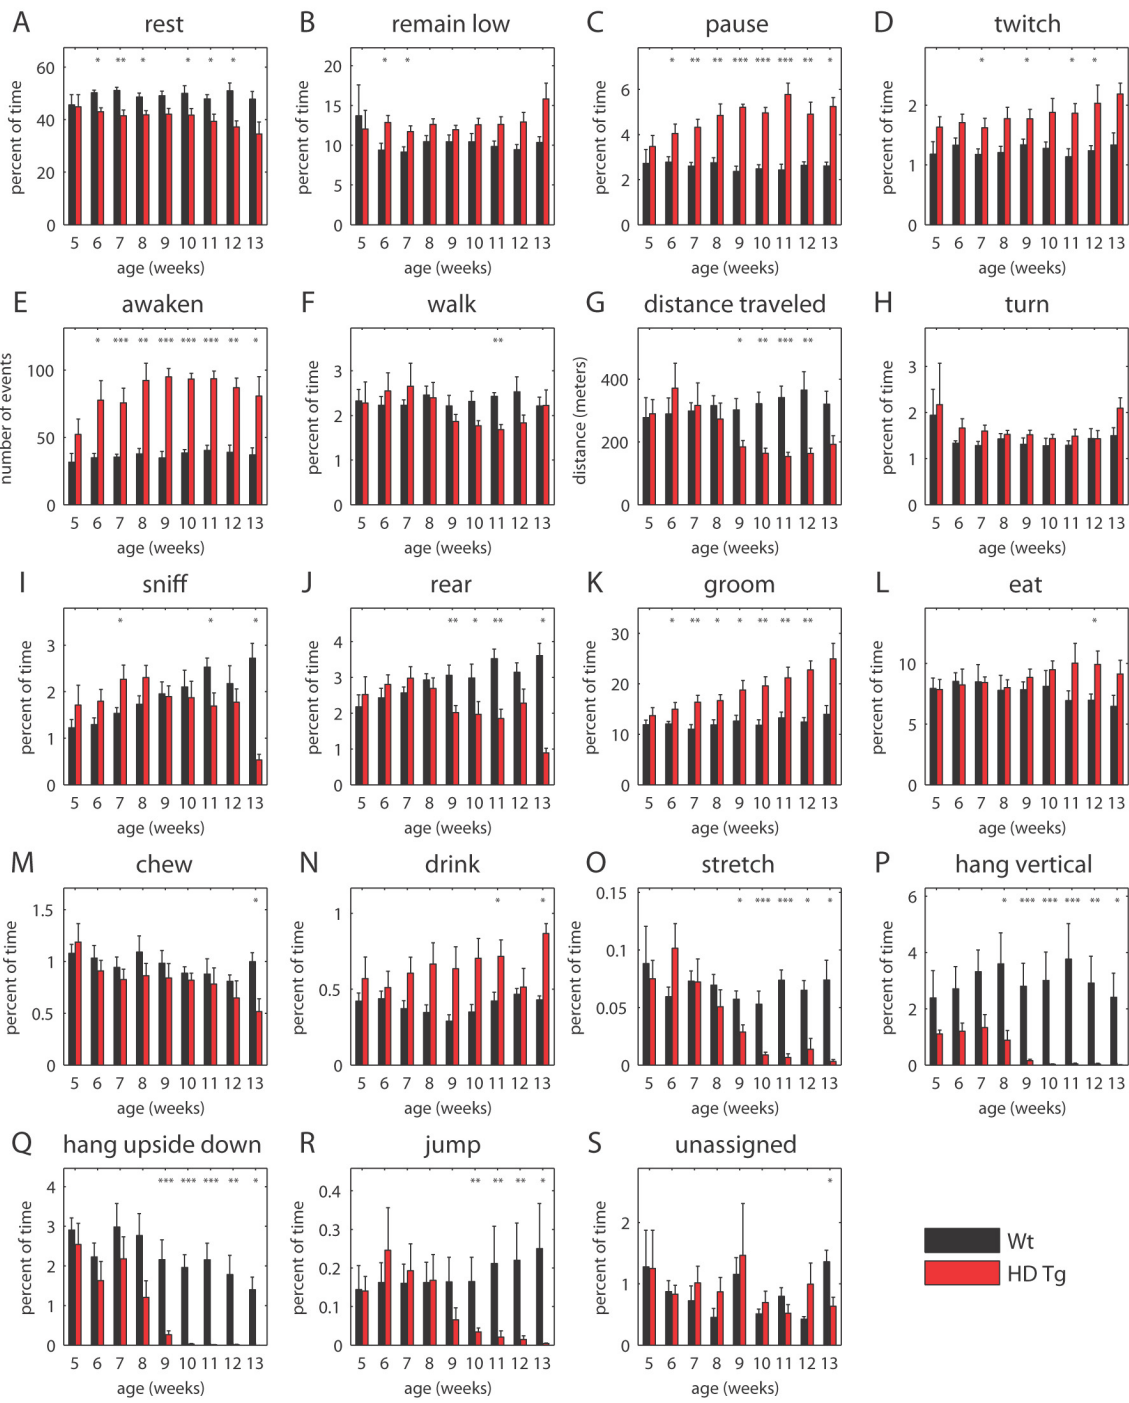

Supplement: pnas_0610779104_1.pdf [file pnas_0610779104_1.pdf]

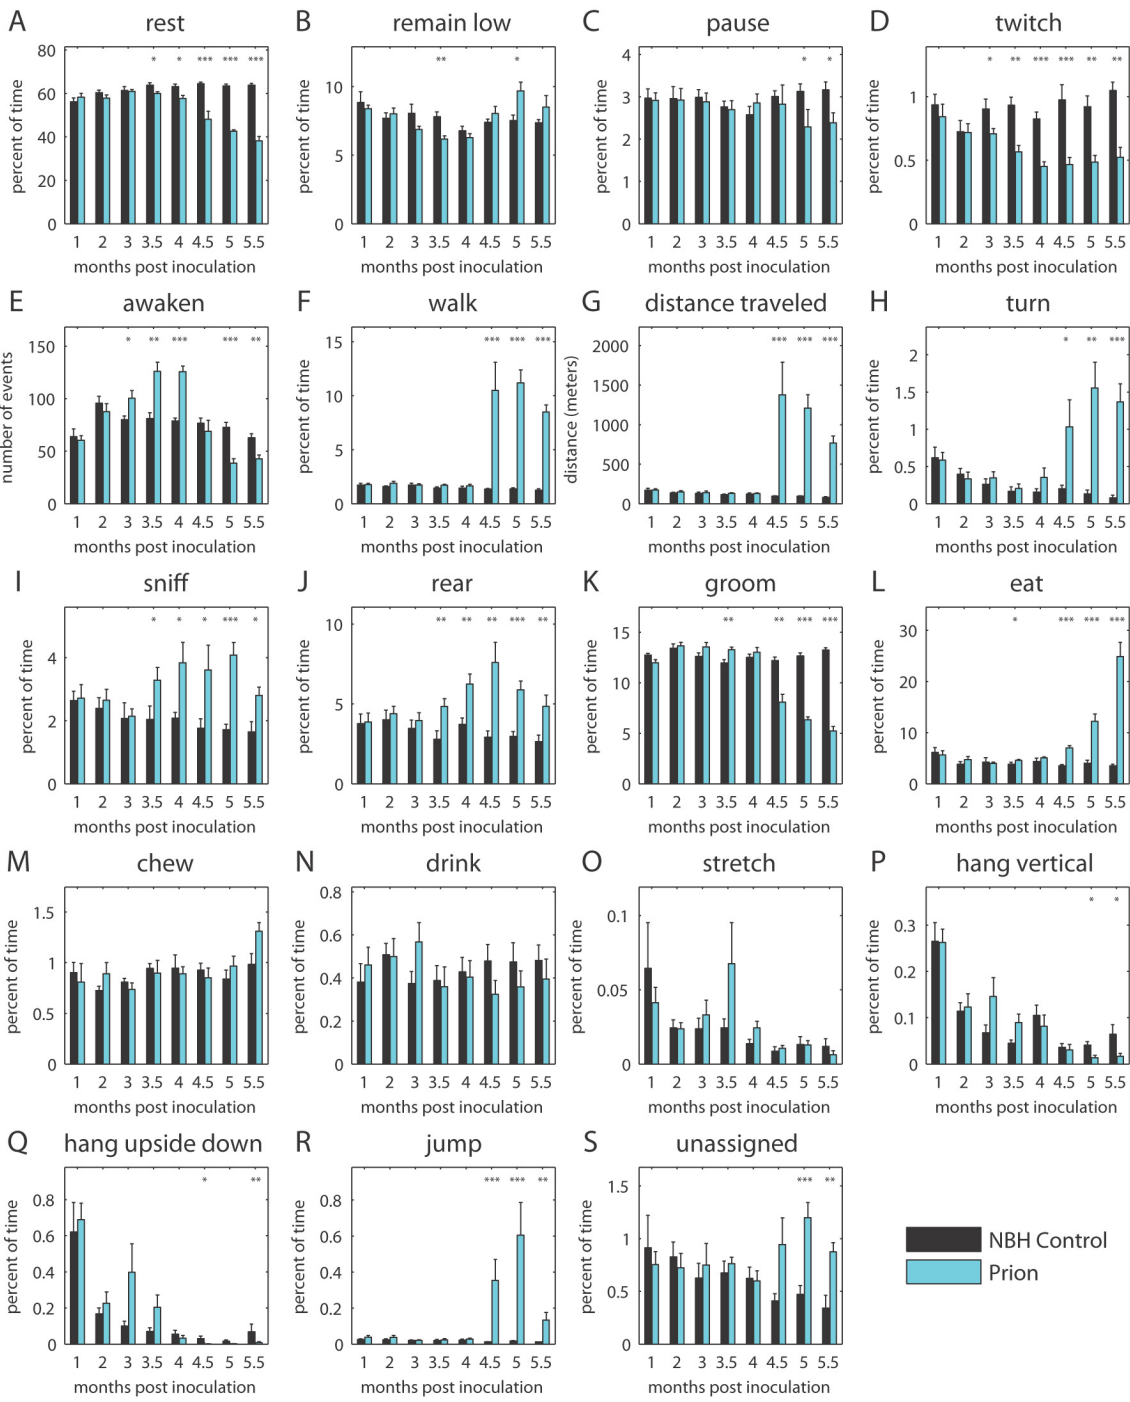

Supplement: pnas_0610779104_2.pdf [file pnas_0610779104_2.pdf]

A

## Huntington's disease

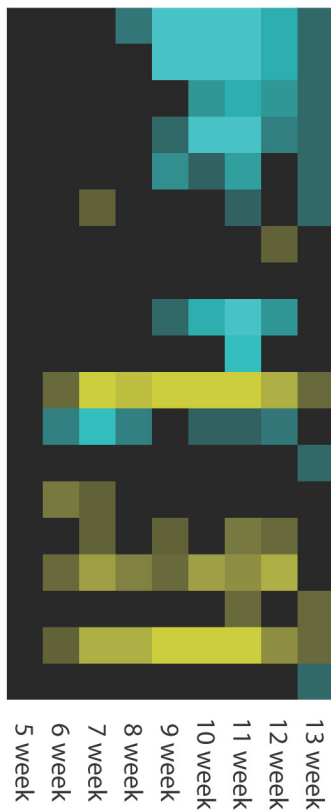

B

## Prion disease

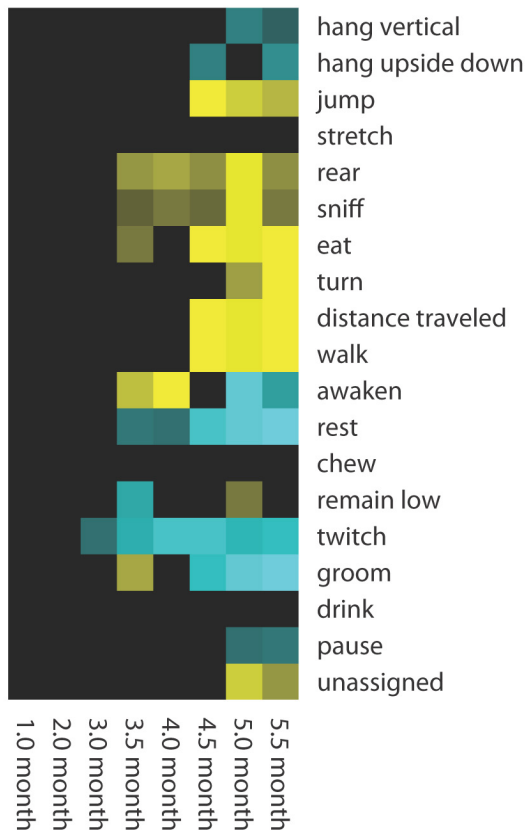

$<10^{-4}$   $10^{-3}$   $10^{-2}$   $p > 0.05$   $10^{-2}$   $10^{-3}$   $<10^{-4}$

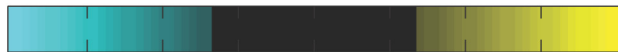

p-value (Wilcoxon rank-sum test)

Supplement: pnas_0610779104_4.pdf [file pnas_0610779104_4.pdf]
